# Supplementary material for: miR-19a: An Effective Regulator of SOCS3 and Enhancer of JAK-STAT Signalling
Source: PLOS journal article supplement (doi:10.1371/journal.pone.0069090), 2013-07-22
Supplement: S4 (10.1371/journal.pone.0069090.s004) [file journal.pone.0069090.s004]

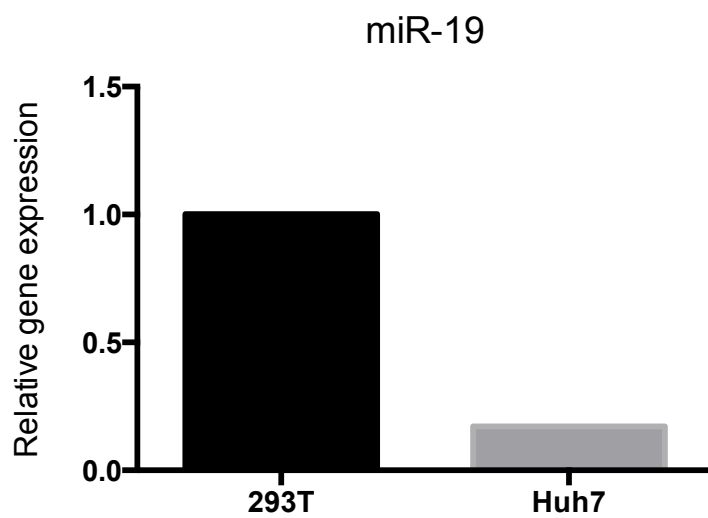

Figure S4
